# Supplementary material for: Promoter Region Hypermethylation and mRNA Expression ofMGMTandp16Genes in Tissue and Blood Samples of Human Premalignant Oral Lesions and Oral Squamous Cell Carcinoma
Source: Hindawi journal article supplement (doi:10.1155/2014/248419), 2014-01-01
Supplement: f1 [file 248419.f1.pdf]

**Supplementary figure 1a: Restriction endonuclease digestion of methylated and unmethylated PCR product of *MGMT* gene**

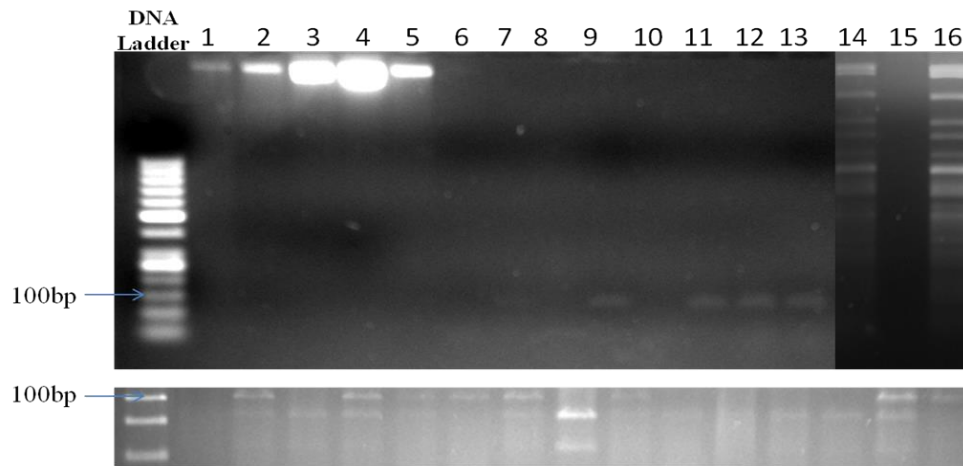

**Gel 1:** Well 1 to 3: Unmethylated control DNA treated with BstU1; 4, 5: Methylated control DNA treated with Taq1; 6 to 13: methylated and unmethylated PCR products (without treated with any enzyme); 14, 16: methylated gDNA treated with BstU1; well 15: no sample. **Gel 2:** Methylated positive digested with BstU1. DNA ladder: 25bp

**Supplementary figure 1b: Restriction endonucleases digestion of methylated and unmethylated PCR product of *p16* gene**

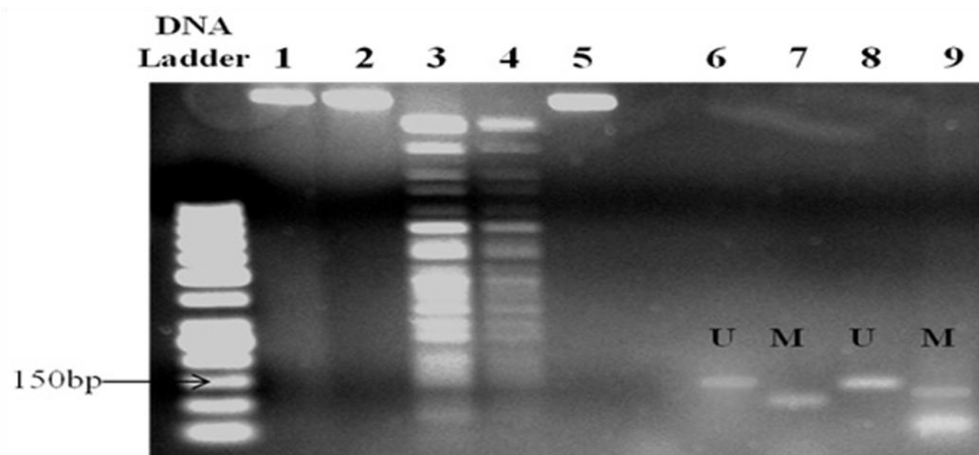

**Well 1, 2 and 5:** Unmethylated control DNA; 3, 4: Methylated control DNA; 6, 7: MSP PCR product: not treated with enzyme; 8, 9: PCR product with enzyme treatment. U: un methylated (151bp); M: Methylated (150bp). DNA ladder: 50bp
